# Supplementary material
Source: PubMed Central journal article supplement (PMC3540846)
Supplement: supp_M025395_jlr.M025395-1.pdf [file supp_M025395_jlr.M025395-1.pdf]

## Supplemental Information

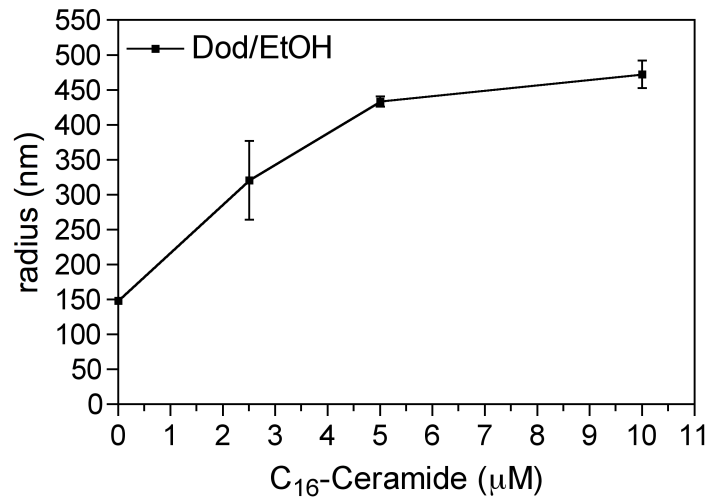

**Fig. S1.** Particles were prepared with increasing amounts of C<sub>16</sub>-ceramide delivered in dodecane/ethanol (2%/98%) for a final concentration of 1% in assay buffer. Preparations were analyzed by dynamic light scattering for measurement of particle size. Data represent the average of 2 independent experiments that were measured at least 5 times per sample.
